# Supplementary material
Source: PubMed Central journal article supplement (PMC6646221)
Supplement: ao8b01751_si_001.pdf [file ao8b01751_si_001.pdf]

## **SUPPORTING INFORMATION**

### **Consumption of H<sub>2</sub>S from Our Daily diet: Determination by a Simple Chemosensing Method**

Ayndrila Ghosh<sup>‡</sup>, Sujoy Das<sup>‡</sup>, Himadri S. Sarkar, Shampa Kundu, Prithidipa Sahoo\*

Department of Chemistry, Visva-Bharati University, Santiniketan, 731235, W.B., India

\*Corresponding author. E-mail: prithidipa@hotmail.com

‡These authors contributed equally.

**Table S1. Performance Comparison of Existing Methods and Present Methods based on azide reduction mechanism for Determination of H<sub>2</sub>S.**

| <b>Anal ytes</b>                                       | <b>Sensor type</b>                         | <b>Detect ion limit( <math>\mu</math>M)</b> | <b>Detection medium</b> | <b>Detection method</b>                 | <b>Detecti on state</b> | <b>Sensitivity &amp; Selectivity</b> | <b>Response Time</b> | <b>Estimat ion in samples</b> | <b>Reference</b>                                         |
|--------------------------------------------------------|--------------------------------------------|---------------------------------------------|-------------------------|-----------------------------------------|-------------------------|--------------------------------------|----------------------|-------------------------------|----------------------------------------------------------|
| <b>H<sub>2</sub>S</b>                                  | <b>Napthalim ide</b>                       | <b>0.066</b>                                | <b>Neutral</b>          | <b>Naked eye UV-Vis Fluoresce nce</b>   | <b>Liquid Gas</b>       | <b>High</b>                          | <b>25 sec</b>        | <b>Foods from daily diet</b>  | <b>Current method</b>                                    |
| H <sub>2</sub> S<br>NO<br>NO <sub>2</sub> <sup>-</sup> | Aza-<br>BODIPY                             | 14.67                                       | Neutral                 | Naked eye<br>UV-Vis<br>Fluoresce<br>nce | Liquid                  | High                                 | 30 sec               | nd                            | Anal. Chem.<br>2014, <b>86</b> ,<br>9335–9342.           |
| H <sub>2</sub> S                                       | 1,8-<br>Napthalimi<br>de                   | nd                                          | Neutral                 | Fluoresce<br>nce                        | Liquid                  | High                                 | 45-60 min            | nd                            | Anal. Chem.<br>2016, <b>88</b> ,<br>9213–9218.           |
| H <sub>2</sub> S                                       | D-<br>aminolucif<br>erin                   | 0.1                                         | Neutral                 | Fluoresce<br>nce                        | Liquid                  | High                                 | 60 min               | nd                            | Anal. Chem.<br>2015, <b>87</b> ,<br>11325–1133<br>1.     |
| H <sub>2</sub> S                                       | Carbon<br>dots-<br>Naphthalim<br>ide-azide | 0.010                                       | Neutral                 | UV-Vis<br>Fluoresce<br>nce              | Liquid                  | High                                 | 15 min               | nd                            | Chem.<br>Commun.,<br>2013, <b>49</b> ,<br>403-405.       |
| H <sub>2</sub> S                                       | Hydrosulfi<br>de<br>Naphthalim<br>ide      | 1-10                                        | Neutral                 | Fluoresce<br>nce                        | Liquid                  | Moderat<br>e                         | 45-90 min            | nd                            | Chem.<br>Commun.,<br>2012, <b>48</b> ,<br>4767–4769.     |
| H <sub>2</sub> S                                       | Coumarin–<br>benzopyryl<br>ium             | 0.22                                        | Neutral                 | Naked eye<br>UV-Vis<br>Fluoresce<br>nce | Liquid                  | High                                 | ~1 min               | nd                            | AnalyticaChi<br>micaActa<br>2015, <b>859</b> ,<br>59–65. |
| H <sub>2</sub> S                                       | Dicyanome<br>thylene-<br>4H-<br>chromene   | nd                                          | Neutral                 | Naked eye<br>UV-Vis<br>Fluoresce<br>nce | Liquid                  | High                                 | 2 min                | nd                            | Dyes and<br>Pigments.<br>2013, <b>98</b> ,<br>367-371    |

|                      |                               |           |         |                               |        |          |           |    |                                                   |
|----------------------|-------------------------------|-----------|---------|-------------------------------|--------|----------|-----------|----|---------------------------------------------------|
| H <sub>2</sub> S     | Dansylazide                   | 1         | Neutral | UV-Vis Fluorescence           | Liquid | High     | 15 min    | nd | Angew. Chem. Int. Ed. 2011, <b>50</b> , 9672–9675 |
| H <sub>2</sub> S     | Imidazole                     | 0.435     | Neutral | UV-Vis Fluorescence           | Liquid | High     | 20-30 min | nd | Biochemistry 2014, <b>53</b> , 5966–5974.         |
| H <sub>2</sub> S, NO | Rhodamine                     | nd        | Neutral | Fluorescence                  | Liquid | High     | 25 min    | nd | Chem. Commun., 2015, <b>51</b> , 4414–4416        |
| H <sub>2</sub> S     | Rhodamine                     | 5-10      | Neutral | Fluorescence                  | Liquid | High     | 60 min    | nd | J. Am. Chem. Soc. 2011, <b>133</b> , 10078–10080. |
| H <sub>2</sub> S     | <i>p</i> -azidophenylalanine  | <50       | Neutral | Fluorescence                  | Liquid | Moderate | 12 hrs    | nd | J. Am. Chem. Soc. 2012, 134, 9589–9592            |
| H <sub>2</sub> S     | Coumarin                      | nd        | Neutral | Fluorescence                  | Liquid | nd       | 60 min    | nd | J. Am. Chem. Soc. 2015, 137, 15330–15336          |
| H <sub>2</sub> S     | Rhodamine                     | 0.125-0.5 | Neutral | Fluorescence                  | Liquid | High     | 60 min    | nd | PNAS 2013, 110, 7131–7135                         |
| H <sub>2</sub> S     | Napthalimide                  | <0.3      | Neutral | Naked eye UV-Vis Fluorescence | Liquid | High     | 40-80 min | nd | Scientific reports. 2016, 26203                   |
| H <sub>2</sub> S     | Dicyanomethylenedihydrofuran  | nd        | Neutral | Naked eye UV-Vis Fluorescence | Liquid | High     | 60 min    | nd | Tetrahedron Letters 54 (2013) 2980–2982           |
| H <sub>2</sub> S     | 7-Nitrobenz-2-oxa-1,3-diazole | 0.68      | Neutral | Naked eye UV-Vis Fluorescence | Liquid | High     | 5 min     | nd | Tetrahedron 2013, 69, 867-870                     |

## 1. NMR Studies:

### $^1\text{H}$ NMR of Compound 1 in $\text{CDCl}_3$ :

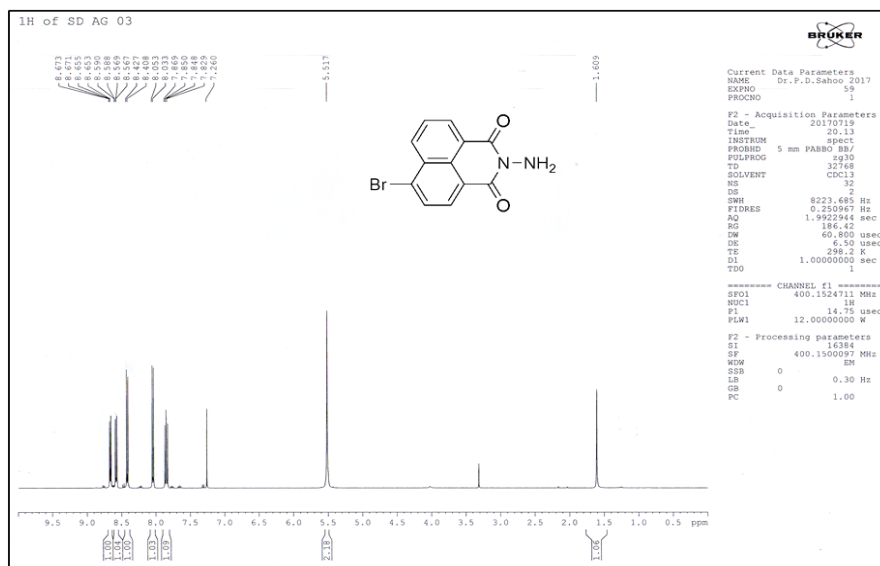

Figure S1.  $^1\text{H}$  NMR of Compound 1 in  $\text{CDCl}_3$

### $^1\text{H}$ NMR of Compound 2 in $\text{CDCl}_3$ :

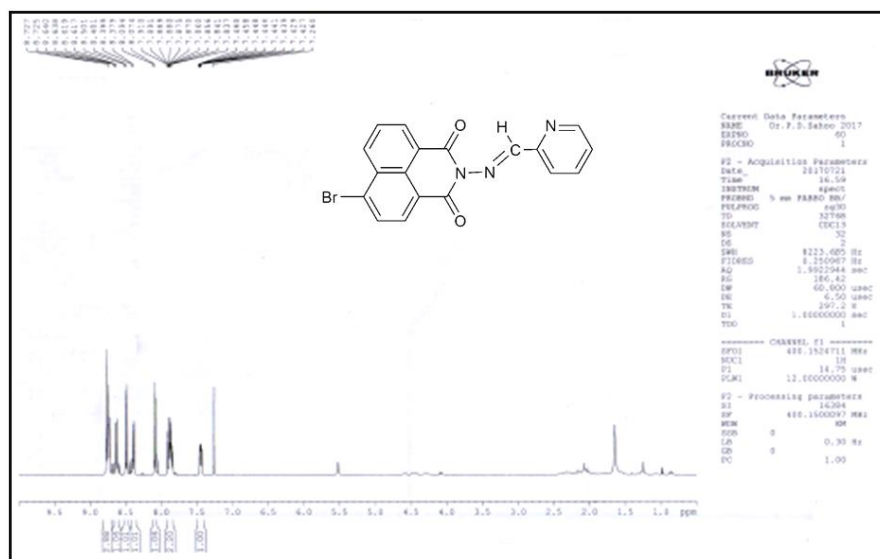

Figure S2.  $^1\text{H}$  NMR of Compound 2 in  $\text{CDCl}_3$  (400 MHz).

### <sup>1</sup>H NMR of PN-N<sub>3</sub> in DMSO-d<sub>6</sub>:

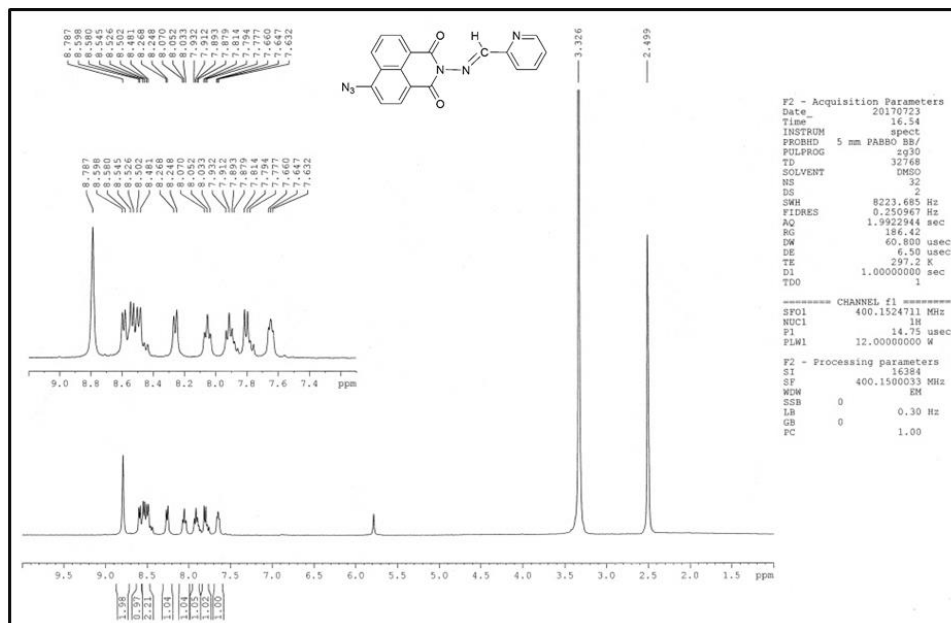

**Figure S3.**  $^1\text{H}$  NMR of **PN-N<sub>3</sub>** in DMSO- $\text{d}_6$  (400 MHz).

### **$^{13}\text{C}$ NMR of PN-N<sub>3</sub> in DMSO-d<sub>6</sub>:**

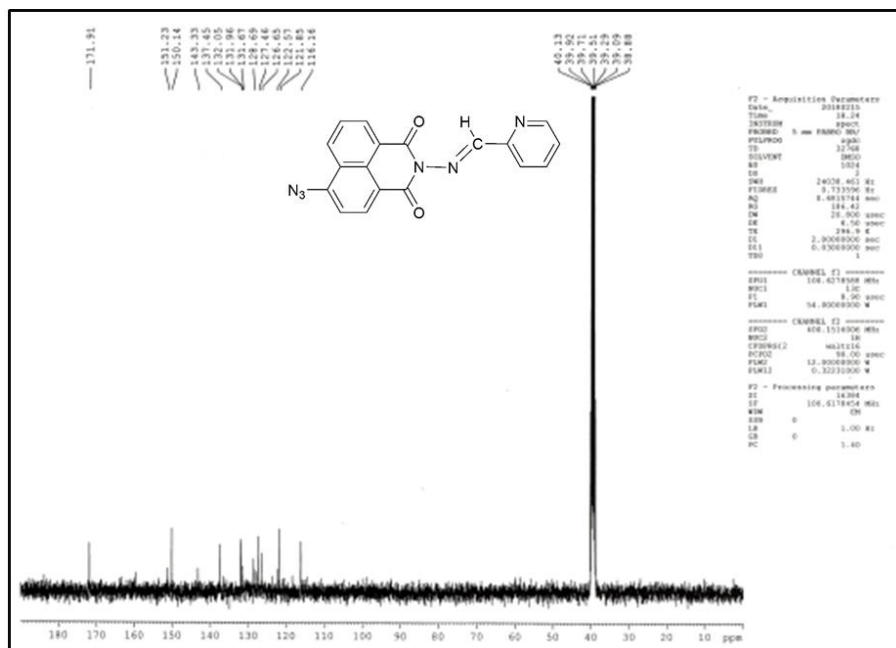

**Figure S4.**  $^{13}\text{C}$  NMR of PN-N<sub>3</sub> in DMSO-d<sub>6</sub> (400 MHz)

## 2. Mass spectrum of PN-N<sub>3</sub>:

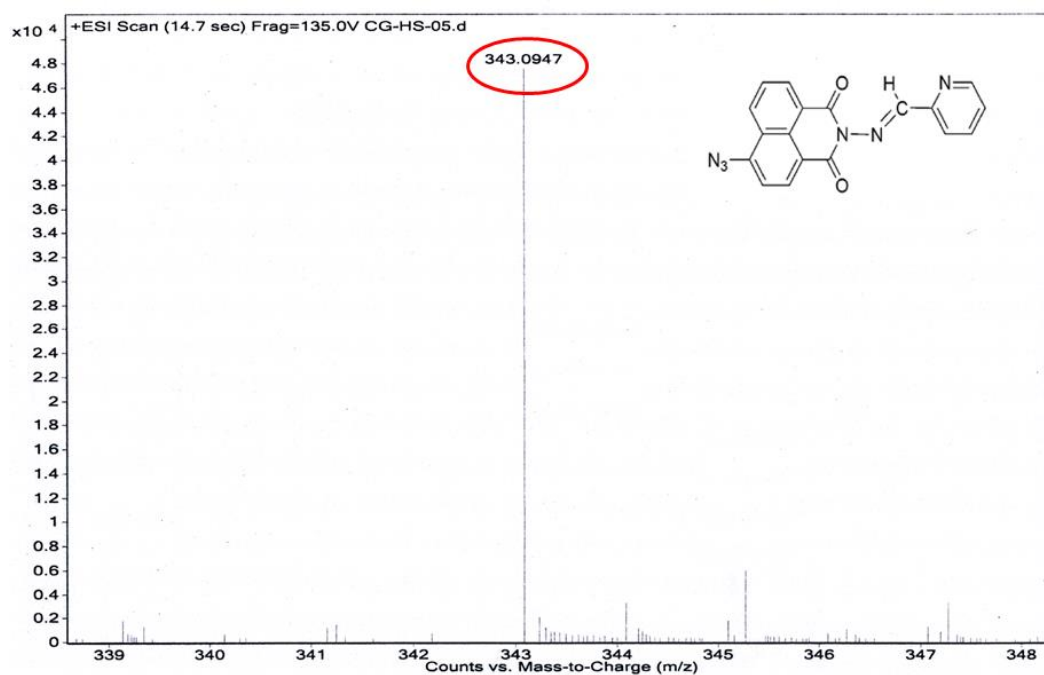

**Figure S5.** MALDI-TOF MS of PN-N<sub>3</sub>.

## 3. Dependence of the absorbance of PN-N<sub>3</sub> on the concentration of H<sub>2</sub>S:

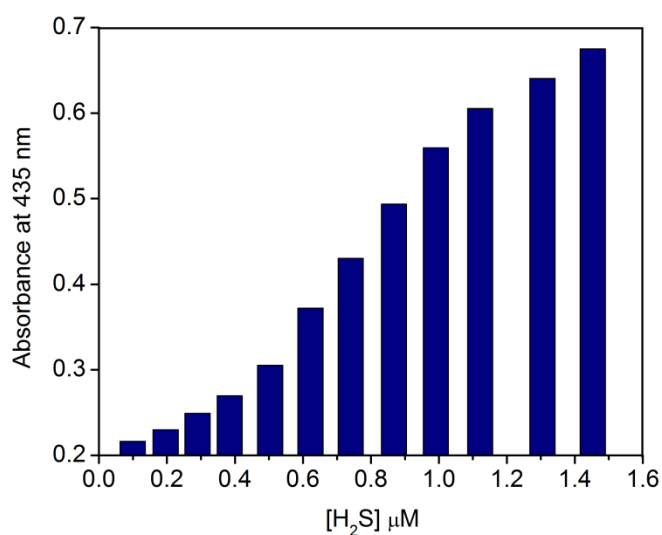

**Figure S6.** Absorbance plot as a function of concentration of H<sub>2</sub>S. The plot implies the enhancement in visual color of the probe solution upon addition of H<sub>2</sub>S in CH<sub>3</sub>CN/H<sub>2</sub>O (1:8, v/v) at pH 7.0.

#### 4. pH titration curve of PN-N<sub>3</sub> upon gradual addition of H<sub>2</sub>S:

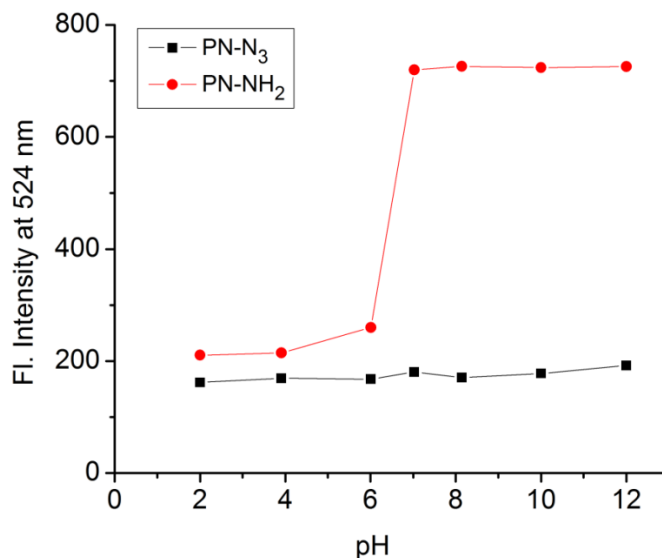

**Figure S7.** Fluorescence responses of **PN-N<sub>3</sub>** (black) and **PN-NH<sub>2</sub>** (red) at different pH conditions in CH<sub>3</sub>CN/H<sub>2</sub>O (1:8, v/v) ( $\lambda_{\text{ex}}$  = 435 nm).

#### 5. Calculation of limit of detection (LOD) of PN-N<sub>3</sub> towards H<sub>2</sub>S:

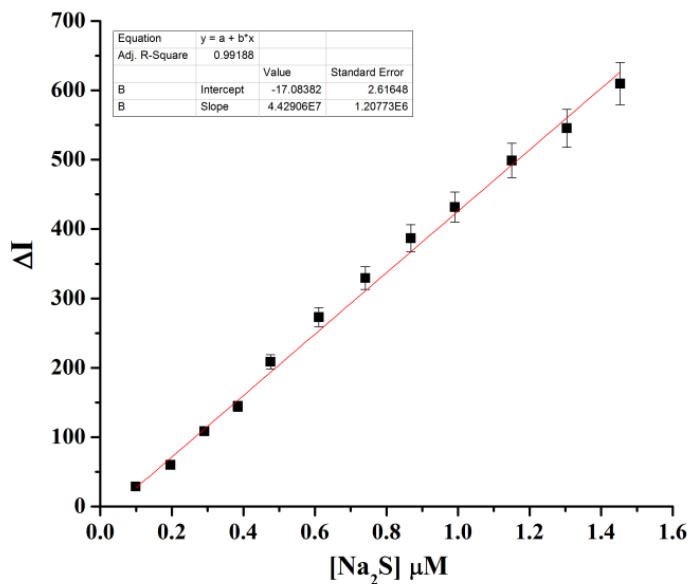

**Figure S8.** Linear fit curve of **PN-N<sub>3</sub>** with respect to Na<sub>2</sub>S concentration.

From the linear fit graph of H<sub>2</sub>S we get slope =  $4.43 \times 10^7$ , and SD value is 1.46363. Thus using the above formula we get the Limit of Detection = 66 nM. Therefore, **PN-N<sub>3</sub>** can detect H<sub>2</sub>S up to this very lower concentration by fluorescence techniques.

## 6. Job's plot for determining the stoichiometry of interaction by fluorescence method:

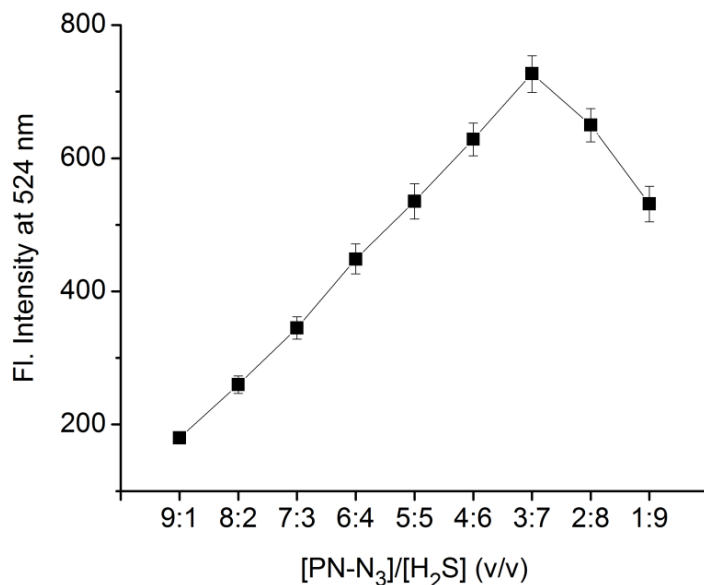

**Figure S9.** Job's plot of interaction of **PN-N<sub>3</sub>** with H<sub>2</sub>S in acetonitrile-water (1:8, v/v), neutral pH, ([PN-N<sub>3</sub>] = [H<sub>2</sub>S] = 10 μM) by fluorescence method ( $\lambda_{\text{ex}}$  = 435 nm).

## 7. Fluorescence response of PN-N<sub>3</sub> in liquid and gas phase:

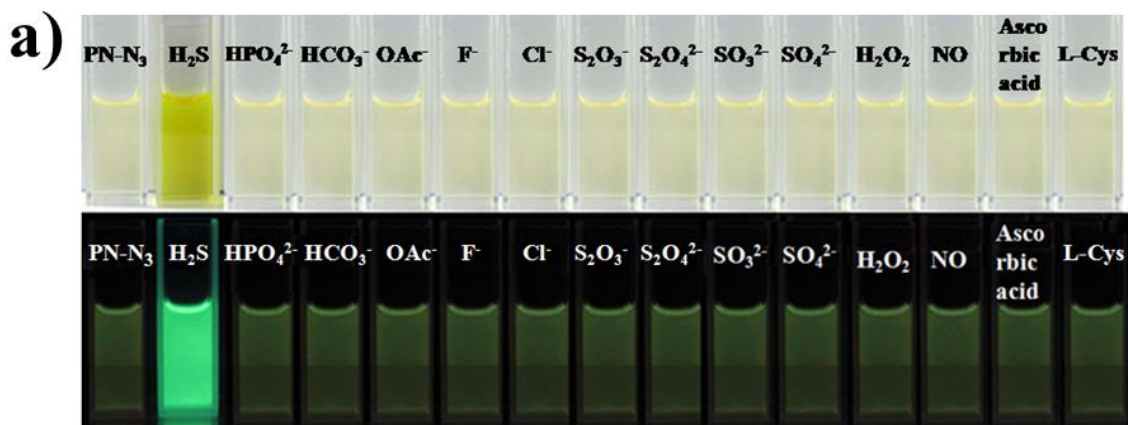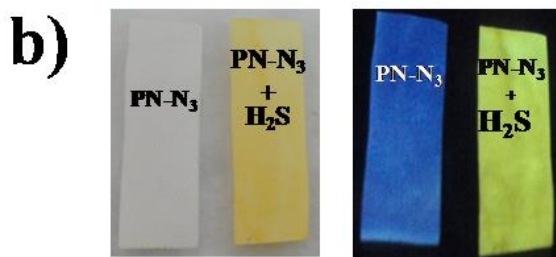

**Figure S10.** (a) Fluorescence response of **PN-N<sub>3</sub>** to various anions [From left to right: Only **PN-N<sub>3</sub>**, **PN-N<sub>3</sub>** with H<sub>2</sub>S, HPO<sub>4</sub><sup>2-</sup>, HCO<sub>3</sub><sup>-</sup>, OAc<sup>-</sup>, F<sup>-</sup>, Cl<sup>-</sup>, S<sub>2</sub>O<sub>3</sub><sup>-</sup>, S<sub>2</sub>O<sub>4</sub><sup>2-</sup>, SO<sub>3</sub><sup>2-</sup>, SO<sub>4</sub><sup>2-</sup>, H<sub>2</sub>O<sub>2</sub>, NO, Ascorbic acid and L-cysteine] in acetonitrile–water (1:8 v/v, pH 7.0, 10 mM phosphate buffer) solution. (b) Fluorescence color changes visualized on filter paper strips after 10 minutes of incubation of **PN-N<sub>3</sub>** and **PN-N<sub>3</sub>** with H<sub>2</sub>S respectively.

## 8. Comparative absorbance and fluorescence titration spectra:

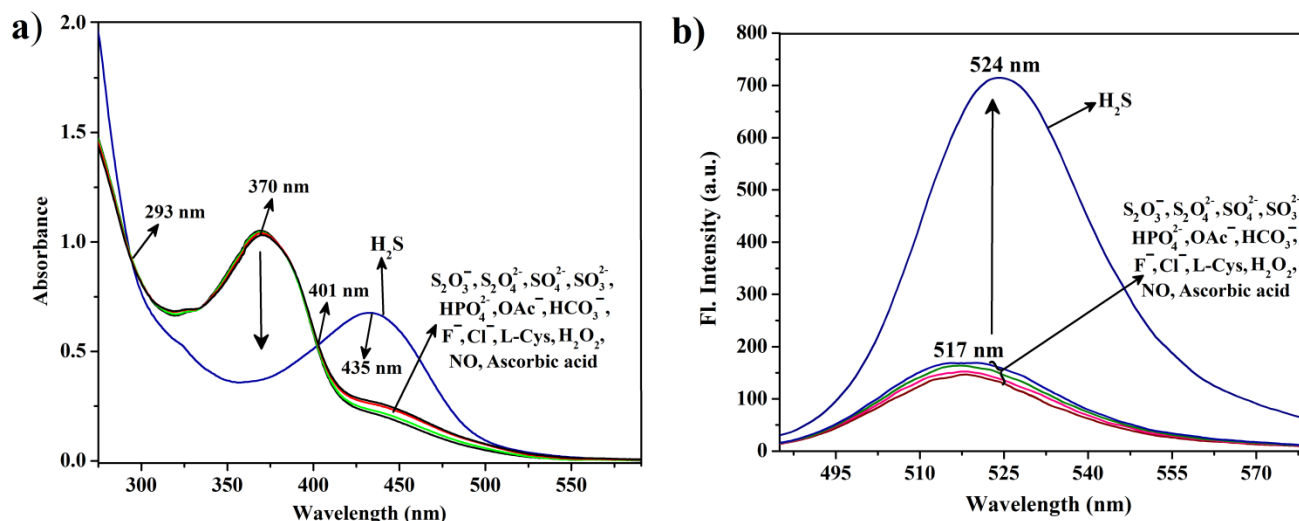

**Figure S11.** (a) Comparative absorbance spectra of **PN-N<sub>3</sub>** (20 μM) in CH<sub>3</sub>CN/H<sub>2</sub>O, 1:8 (v/v), (pH 7.0, 10 mM phosphate buffer) after addition of various anions, H<sub>2</sub>O<sub>2</sub>, NO, Ascorbic acid and L-cysteine, upto 20 equiv. (b) Comparative fluorescence emission spectra of **PN-N<sub>3</sub>** (c = 20 μM) in CH<sub>3</sub>CN/H<sub>2</sub>O, 1:8 (v/v), (pH 7.0, 10 mM phosphate buffer) after addition of H<sub>2</sub>S along with various anions H<sub>2</sub>O<sub>2</sub>, NO, Ascorbic acid and L-cysteine up to 20 equiv.

9.  $^1\text{H}$  NMR titration spectrum of  $\text{PN-N}_3$  with  $\text{H}_2\text{S}$ :

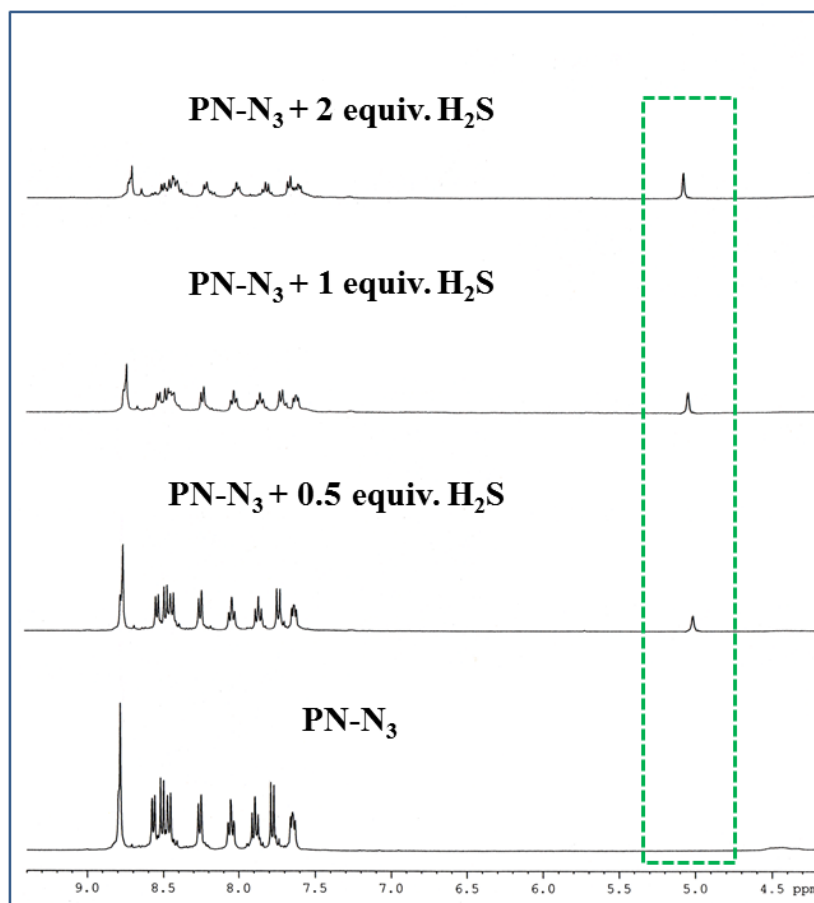

**Figure S12.**  $^1\text{H}$  NMR titration spectra [400 MHz] of  $\text{PN-N}_3$  in  $\text{CD}_3\text{CN}$  at  $25^\circ\text{C}$  and the corresponding changes after the gradual addition of one equiv. of  $\text{H}_2\text{S}$  in  $\text{D}_2\text{O}$  from (i) only  $\text{PN-N}_3$ , (ii)  $\text{PN-N}_3 + 0.5$  equiv. of  $\text{H}_2\text{S}$  (iii)  $\text{PN-N}_3 + 1$  equiv. of  $\text{H}_2\text{S}$ , (iv)  $\text{PN-N}_3 + 2$  equiv. of  $\text{H}_2\text{S}$ .

## 10. Partial HRMS of the mixed assay system:

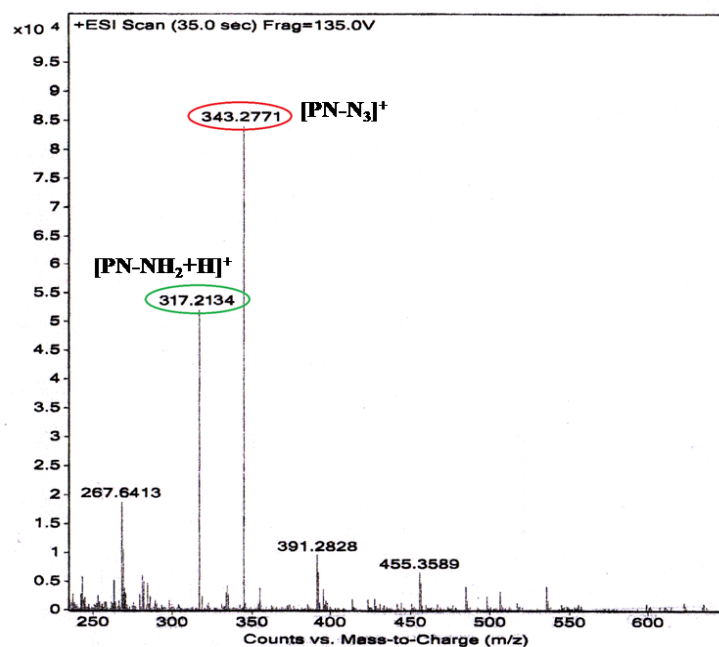

**Figure S13.** Partial HRMS spectra of **PN-N<sub>3</sub>-Na<sub>2</sub>S** mixture in acetonitrile, taken after two hours of mixing.

## 11. Details of energy calculations using Density Functional Theory (DFT):

Top and side view of energy optimized geometry:

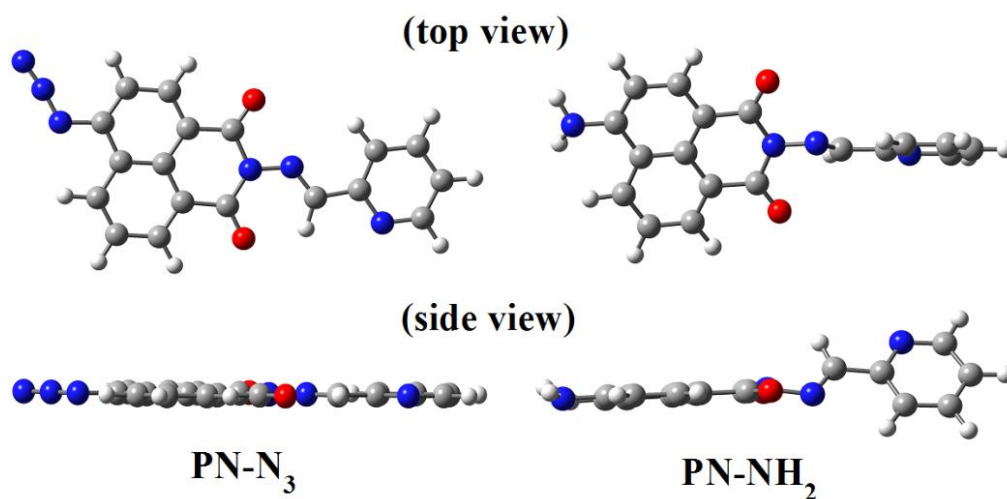

**Figure S14.** Energy optimized geometries of **PN-N<sub>3</sub>** and **PN-NH<sub>2</sub>** obtained at the B3LYP/6-311+G(d,p) levels of theory with CPCM solvation (H<sub>2</sub>O).

**Table S2.** Details of the geometry optimization in Gaussian 09 program.

| Details              | PN-N <sub>3</sub> | 1            | 2            | 3            | PN-NH <sub>2</sub> |
|----------------------|-------------------|--------------|--------------|--------------|--------------------|
| Calculation method   | RB3LYP            | RB3LYP       | RB3LYP       | RB3LYP       | RB3LYP             |
| Basis set            | 6-311G+(d,p)      | 6-311G+(d,p) | 6-311G+(d,p) | 6-311G+(d,p) | 6-311G+(d,p)       |
| E(RB3LYP) (a.u.)     | -1171.133         | -1570.103    | -1969.523    | -1062.239    | -1062.882          |
| Charge, Multiplicity | 0, 1              | -1,1         | 0,1          | -1,1         | 0, 1               |
| Solvent (CPCM)       | Water             | Water        | Water        | Water        | Water              |

**Table S3.** Information detailing for the geometry optimization in Gaussian 09 program.

| Molecules                     | Calculation Method | Basis Set    | E(RB3LYP) (a.u.) | Charge, Multiplicity | Solvent (CPCM) |
|-------------------------------|--------------------|--------------|------------------|----------------------|----------------|
| N <sub>2</sub>                | RB3LYP             | 6-311G+(d,p) | -109.558         | 0,1                  | Water          |
| H <sub>2</sub> S <sub>2</sub> | RB3LYP             | 6-311G+(d,p) | -797.638         | 0,1                  | Water          |
| HS <sup>-</sup>               | RB3LYP             | 6-311G+(d,p) | -398.858         | -1,1                 | Water          |
| H <sub>2</sub> S              | RB3LYP             | 6-311G+(d,p) | -399.411         | 0,1                  | Water          |

**Table S4.** Selected electronic excitation energies (eV), oscillator strengths (f), main configurations of the low-lying excited states of all the molecules and complexes. The data were calculated by TDDFT//B3LYP/6-311G+(d,p) based on the optimized ground state geometries.

| Molecules          | Electronic Transition           | Excitation Energy <sup>a</sup> | f <sup>b</sup> | Composition <sup>c</sup> (%) |
|--------------------|---------------------------------|--------------------------------|----------------|------------------------------|
| PN-N <sub>3</sub>  | S <sub>0</sub> → S <sub>1</sub> | 3.30 eV at 376 nm              | 0.8193         | H-1 → L+1 (70 %)             |
|                    | S <sub>0</sub> → S <sub>9</sub> | 4.25 eV at 285 nm              | 0.5066         | H → L (69.4 %)               |
|                    |                                 |                                |                |                              |
| PN-NH <sub>2</sub> | S <sub>0</sub> → S <sub>1</sub> | 3.09 eV at 408 nm              | 0.7988         | H → L (69.6 %)               |
|                    | S <sub>0</sub> → S <sub>8</sub> | 4.30 eV at 288 nm              | 0.2219         | H-1 → L+1 (68 %)             |

<sup>a</sup>Only selected excited states were considered. The numbers in parentheses are the excitation energy in wavelength. <sup>b</sup>Oscillator strength. <sup>c</sup>H stands for HOMO and L stands for LUMO.

**Table S5.** Energies of the highest occupied molecular orbital (HOMO) and lowest unoccupied molecular orbital (LUMO).

| Species            | $E_{\text{HOMO}}$<br>(a.u) | $E_{\text{LUMO}}$<br>(a.u) | $\Delta E(\text{a.u})$ | $\Delta E(\text{eV})$ | $\Delta E(\text{kcal/mol})$ |
|--------------------|----------------------------|----------------------------|------------------------|-----------------------|-----------------------------|
| PN-N <sub>3</sub>  | -0.24400                   | -0.07083                   | 0.17317                | 4.71                  | 108.66                      |
| PN-NH <sub>2</sub> | -0.24124                   | -0.06607                   | 0.17517                | 4.76                  | 109.90                      |

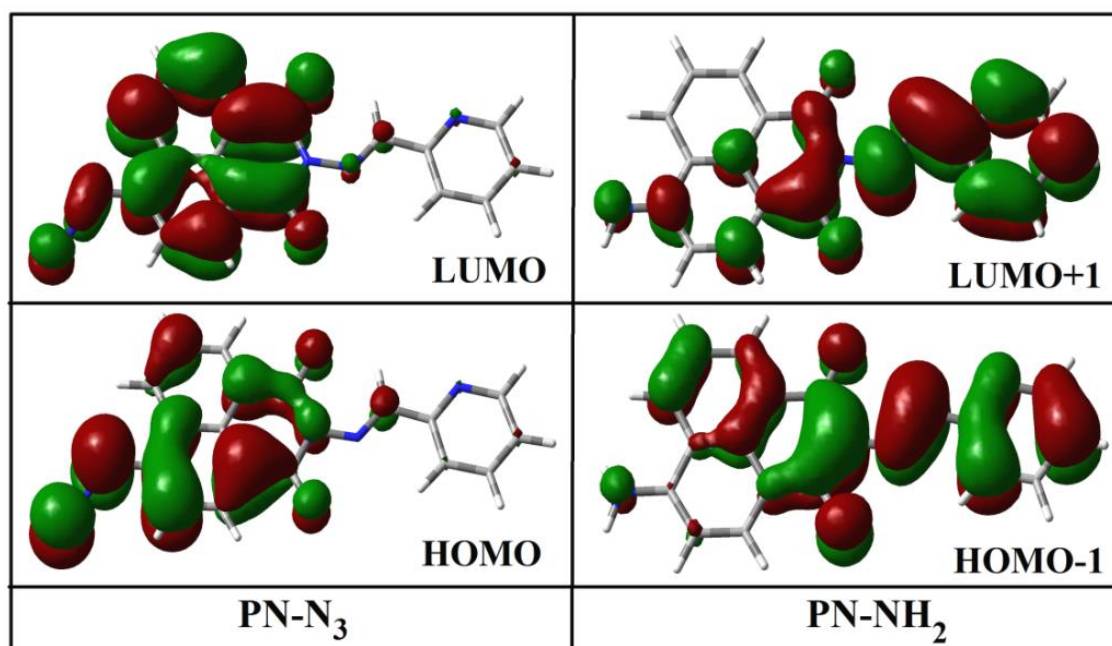

**Figure S15.** All relevant electronic transitions of the probe **PN-N<sub>3</sub>** and the product **PN-NH<sub>2</sub>**.

## 12. Proposed Mechanism:

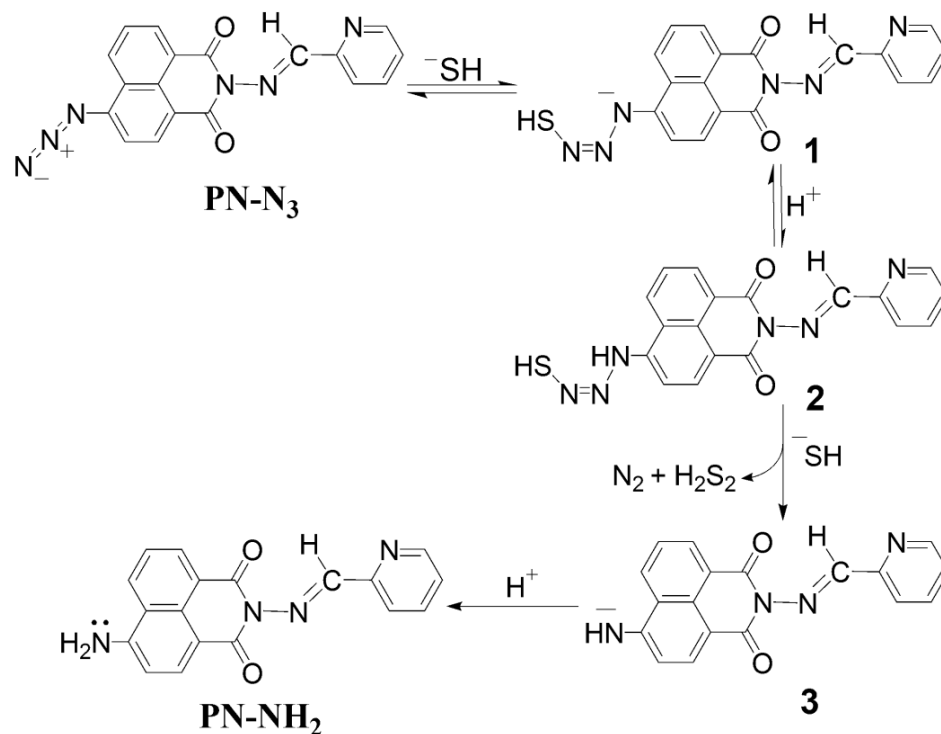

**Scheme S1.** Proposed mechanism for the formation of **PN-NH<sub>2</sub>** from **PN-N<sub>3</sub>** upon addition of two equivalents of H<sub>2</sub>S.

## 13. Images of estimation:

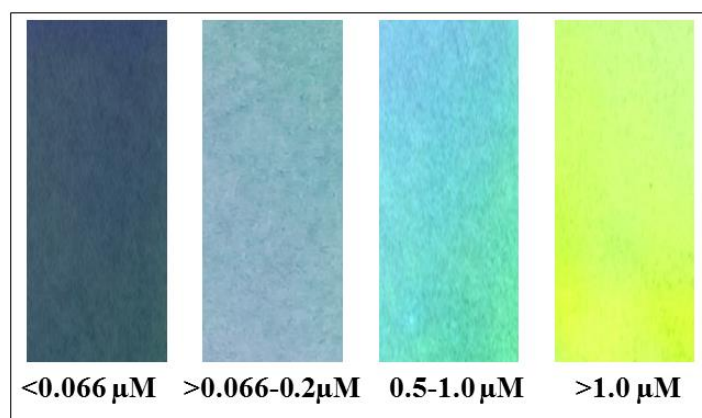

**Figure S16.** Photographic images of filter paper strips soaked for 1 hour in **PN-N<sub>3</sub>** and of commercially available Na<sub>2</sub>S solution (standard) of different concentrations.

#### 14. Colorimetric assay for the estimation of $\text{H}_2\text{S}$ :

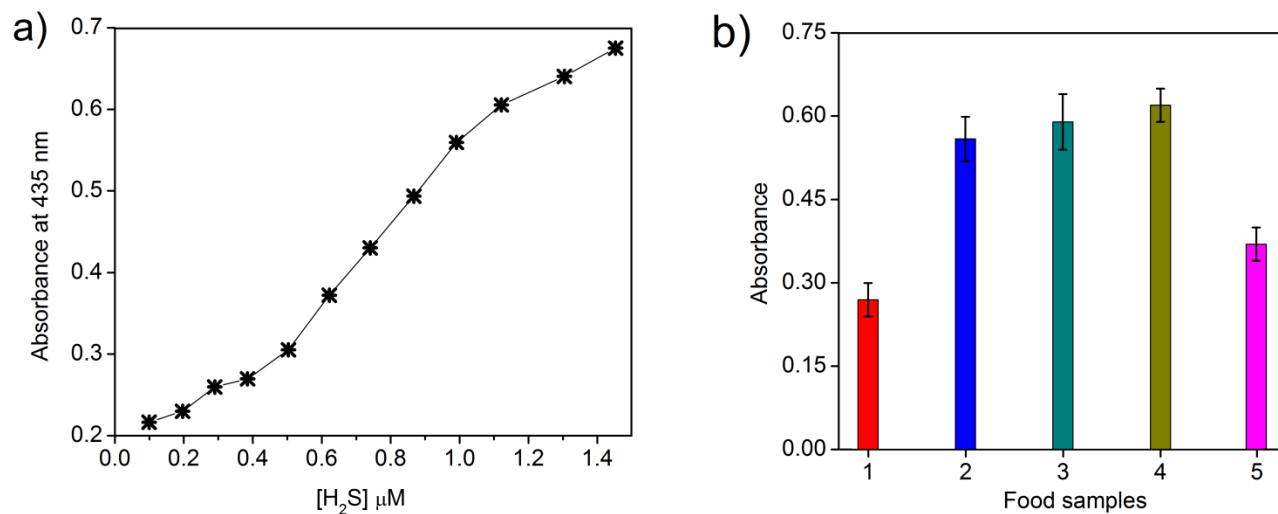

**Figure S17.** a) Standard absorbance plot for **PN-N<sub>3</sub>** with varying concentration of  $\text{H}_2\text{S}$ . b) Bar diagram of the colorimetric assay analysis for estimating the concentration of  $\text{H}_2\text{S}$  present in the food samples with the help of standard absorbance plot. Food samples, 1. Soybean; 2. Chicken; 3. Radish; 4. Egg and 5. Cauliflower.
